# Supplementary material for: Evolution of the SH3 Domain Specificity Landscape in Yeasts
Source: PubMed Central journal article supplement (PMC4466140; doi:10.1371/journal.pone.0129229), 2015-06-11

AgAbp1

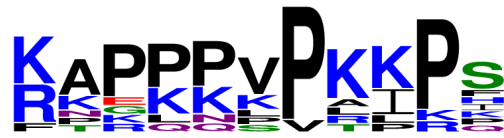

AgBbc1

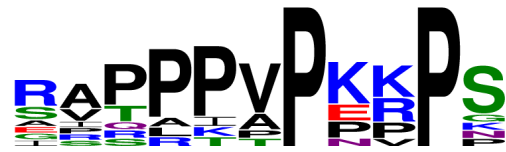

AgBem1

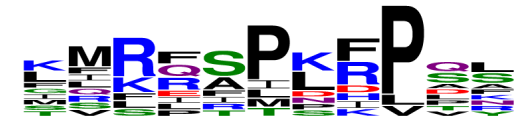

CaAbp1

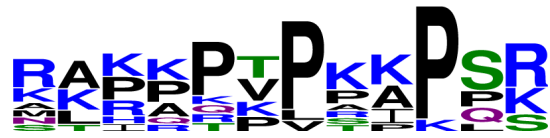

CaBbc1

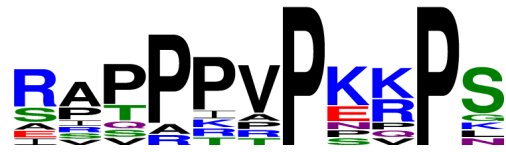

AgBem1-2

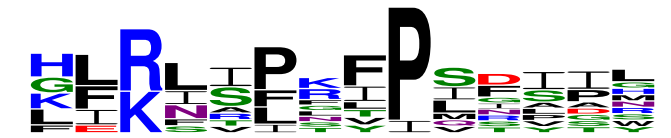

CaAbp1-D2

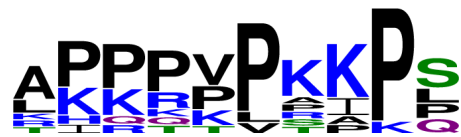

CaBem1

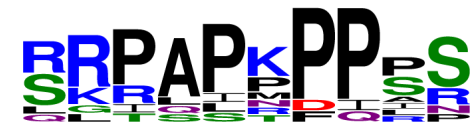

ScAbp1

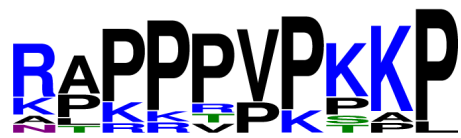

ScBbc1

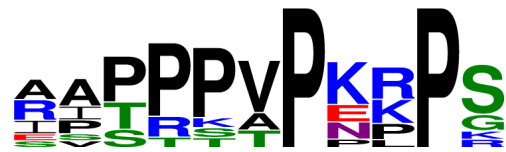

CaBem1-2

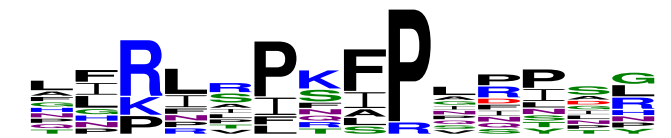

SpAbp1

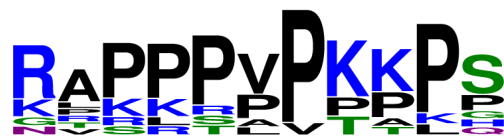

SpBbc1

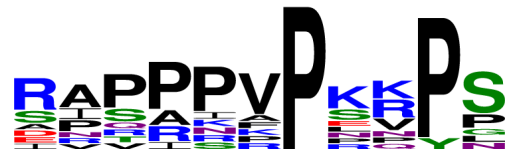

ScBem1

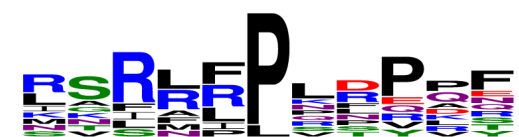

ScBoi2

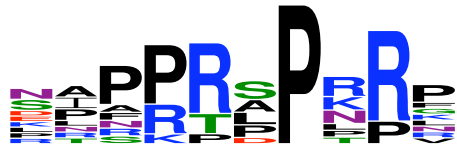

ScBoi1

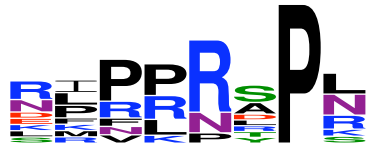

AgBoi2

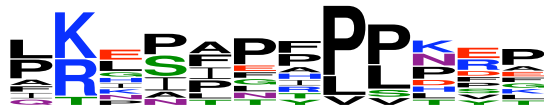

CaBoi2

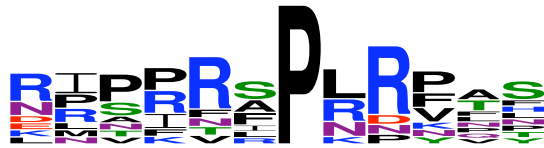

SpBoi2

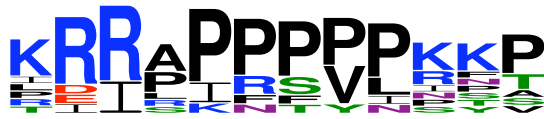

ScBzz1-D1

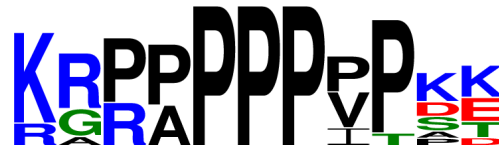

ScBzz1-D2

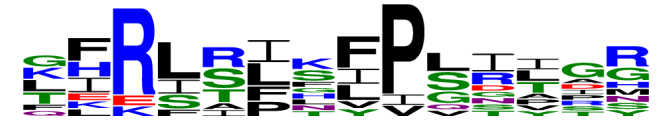

AgBzz1-D1

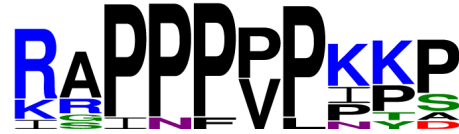

AgBzz1-D2

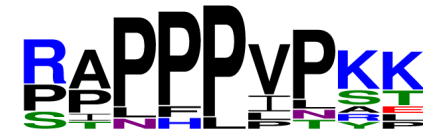

CaBzz1-D1

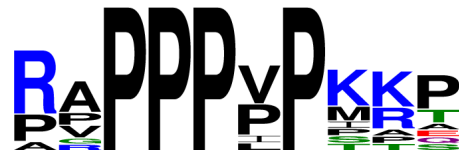

CaBzz1-D2

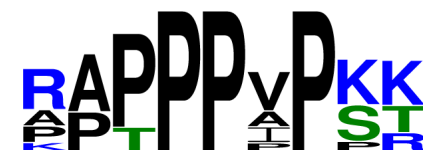

SpBzz1-D1

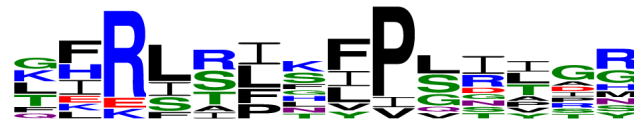

SpBzz1-D2

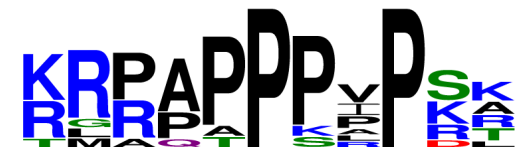



Schse1

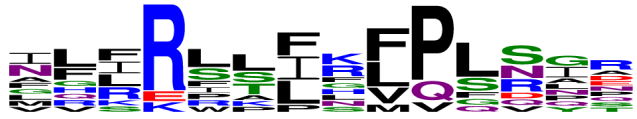

ScLsb1

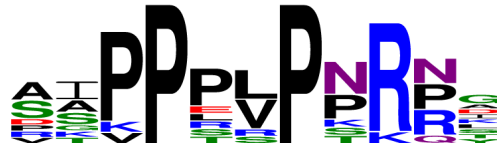

ScLsb4

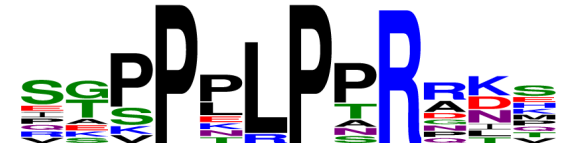

AgHse1

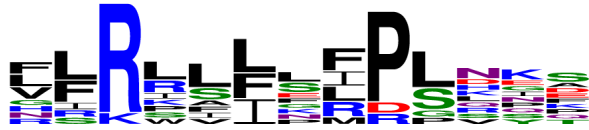

ScLsb2

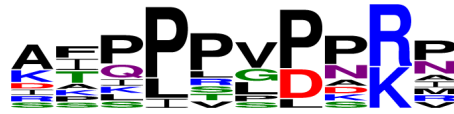

ScLsb3

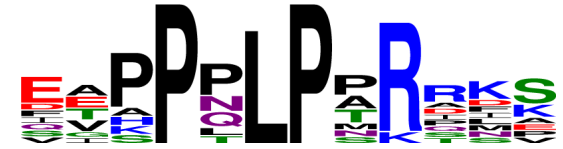

AgLsb1

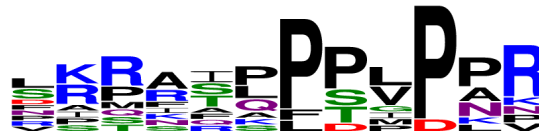

AgLsb4

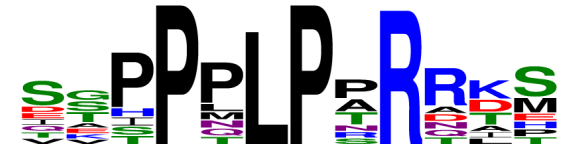

CaHse1

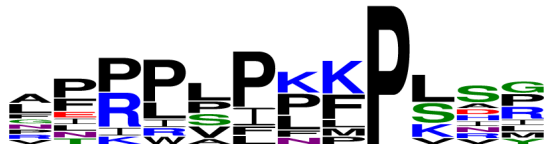

CaLsb1

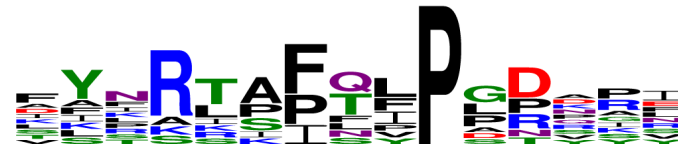

CaLsb4

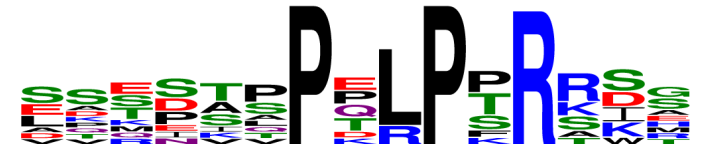

SpHse1

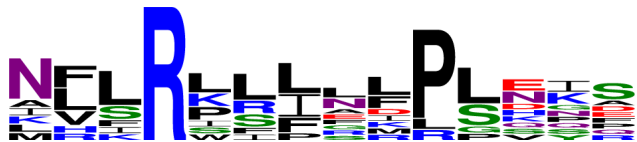

SpLsb1

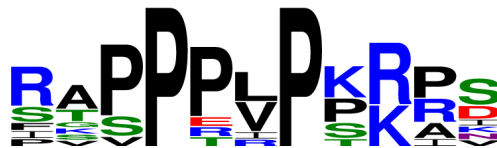

SpLsb4

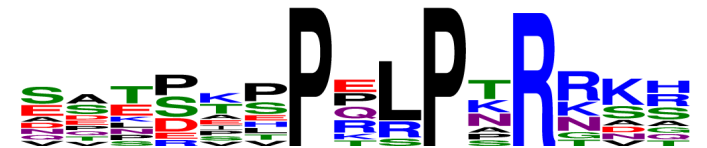

ScNbp2

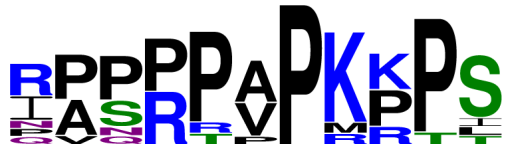

ScPex13

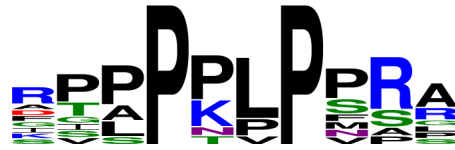

ScSho1

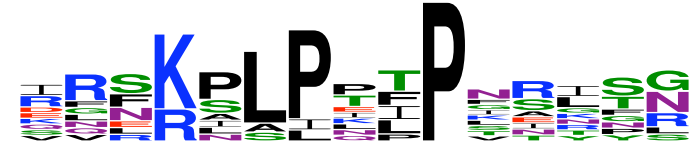

AgNbp2

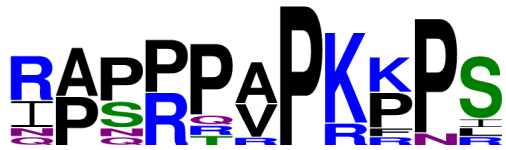

AgSho1

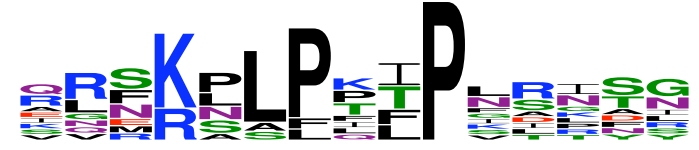

CaNbp2

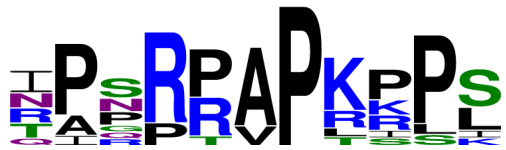

CaSho1

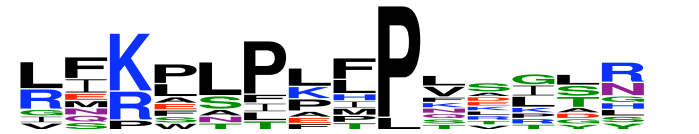

SpNbp2

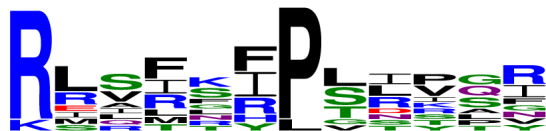

SpPex13

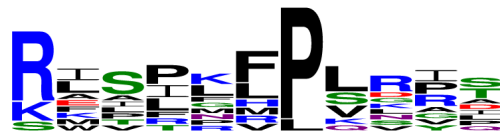

ScSla1-D1-D2

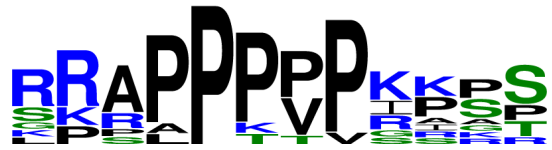

ScSla1-D3

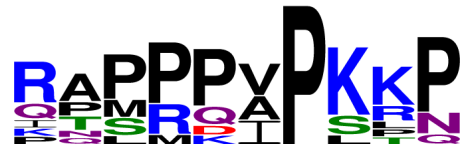

AgSla1-D1-D2

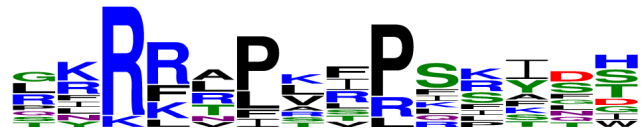

AgSla1-D3

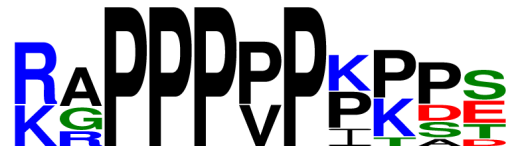

CaSla1-D1-D2

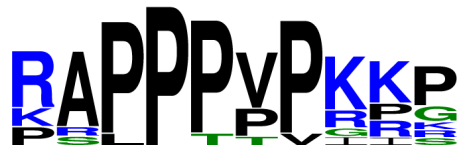

CaSla1-D3

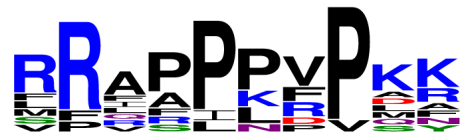

SpSla1-D1-D2

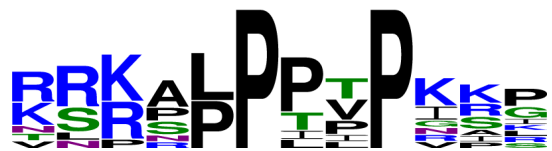

SpSla1-D3

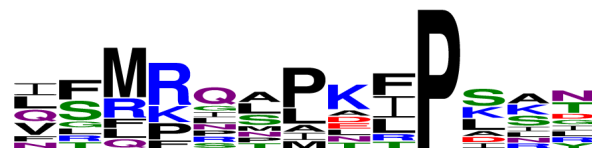

Supplement: pone.0129229.s003.pdf [file pone.0129229.s003.pdf]
