# Supplementary material for: Evolution of the SH3 Domain Specificity Landscape in Yeasts
Source: PubMed Central journal article supplement (PMC4466140; doi:10.1371/journal.pone.0129229), 2015-06-11

A

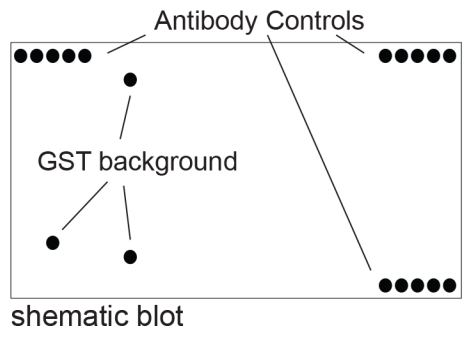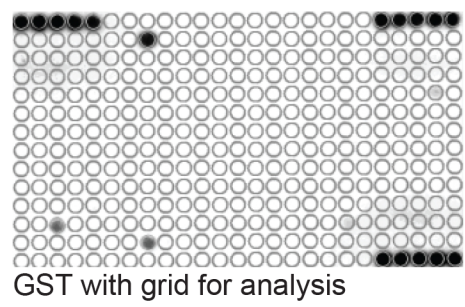

B

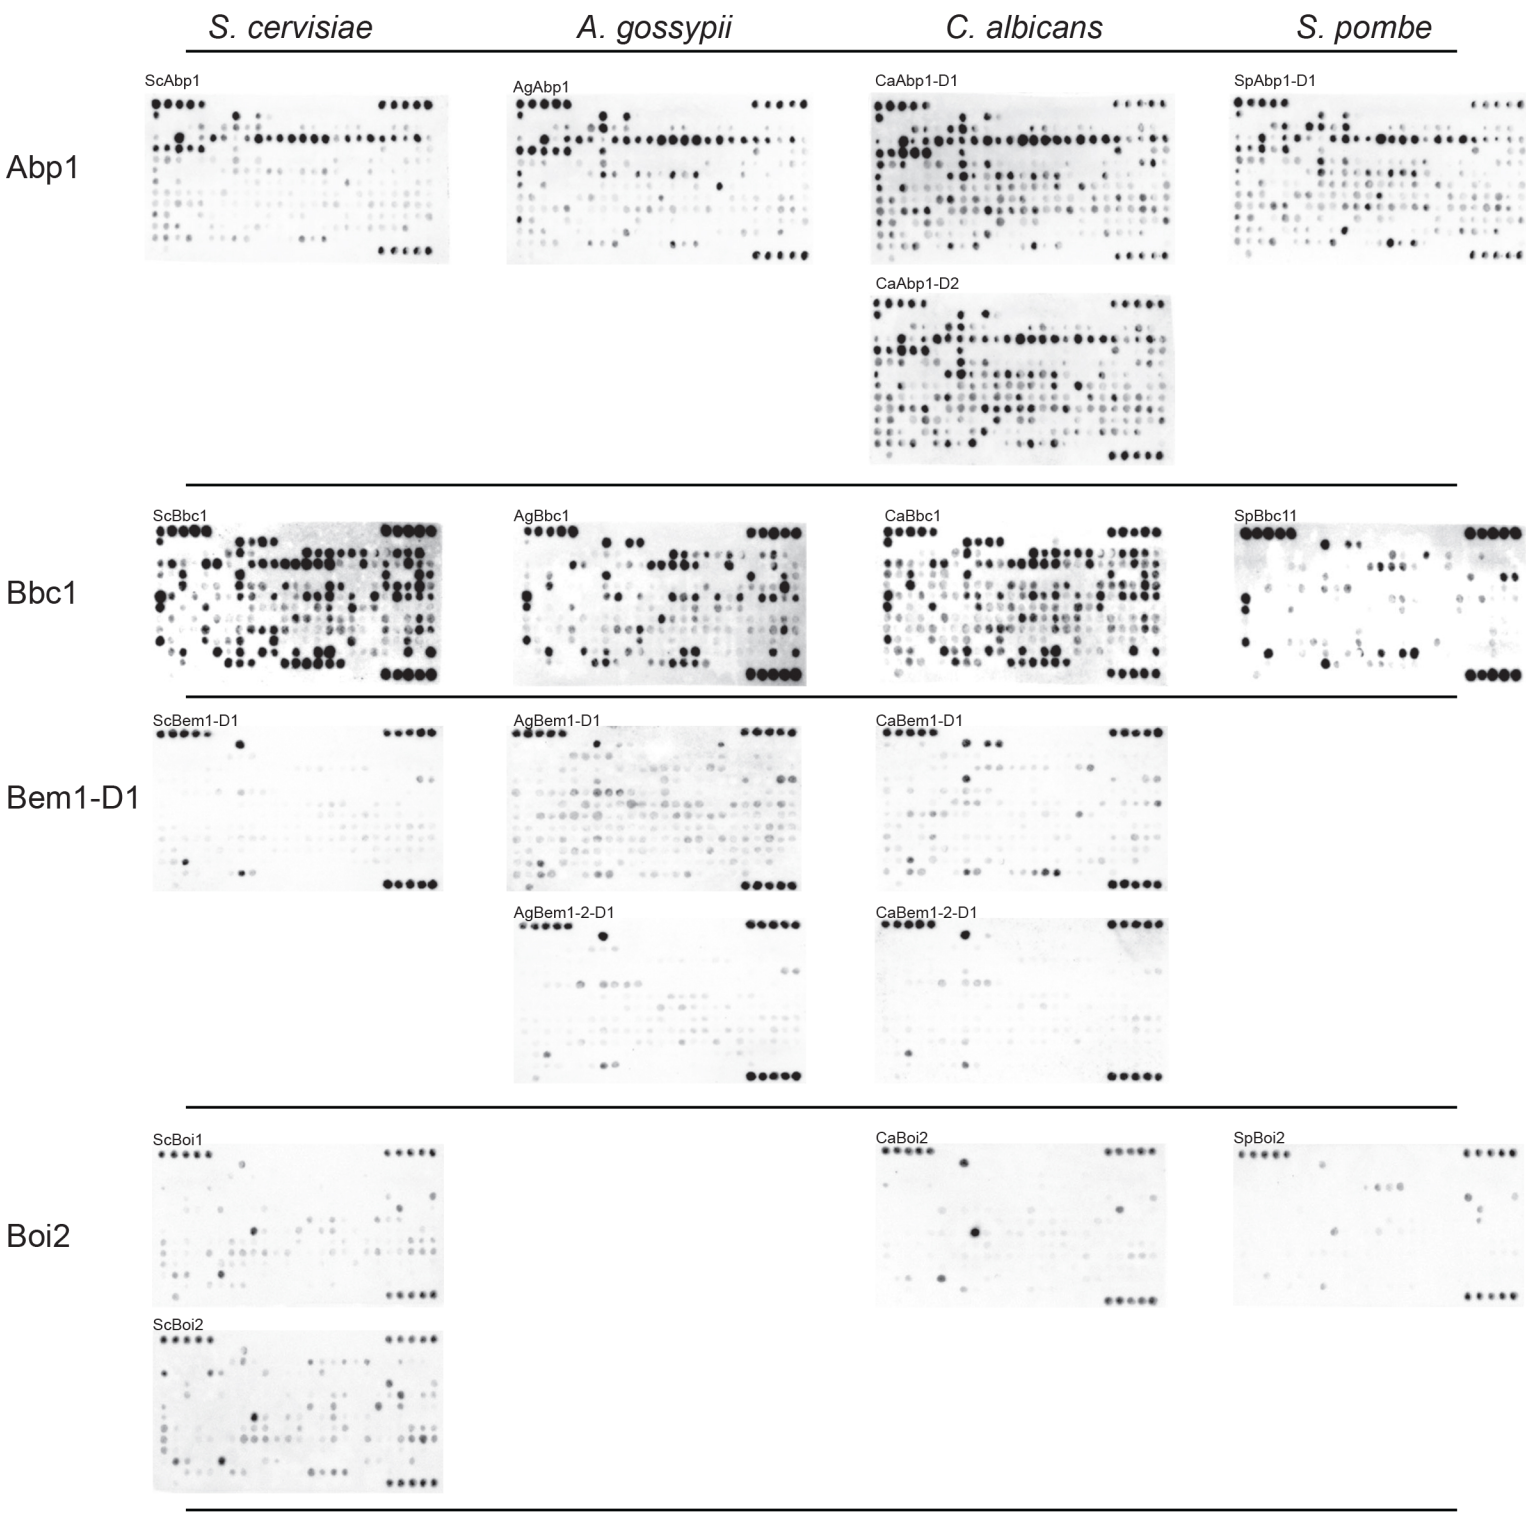

*S. cerevisiae**A. gossypii**C. albicans**S. pombe*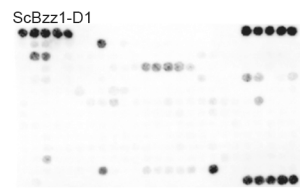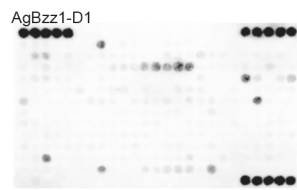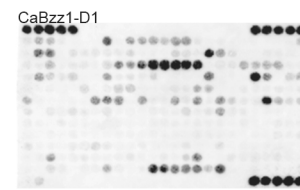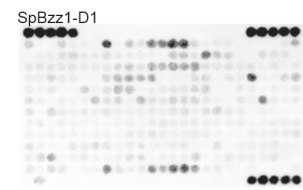

Bzz1-D1

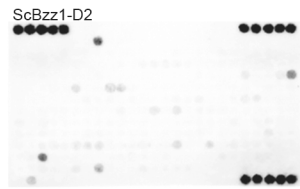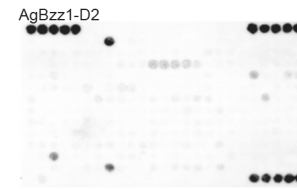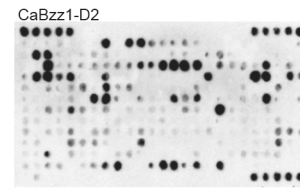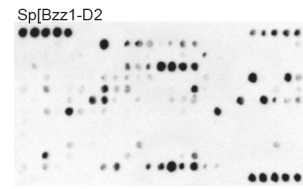

Bzz1-D2

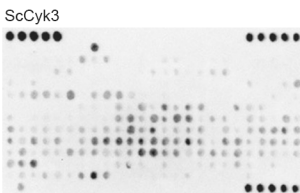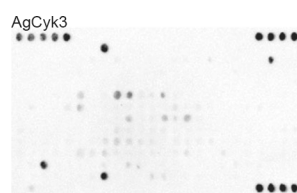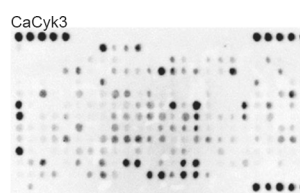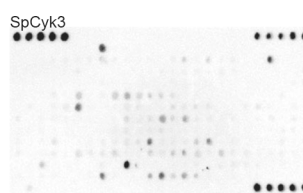

Cyk3

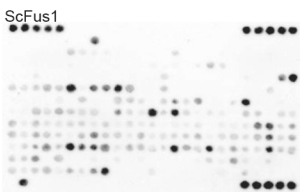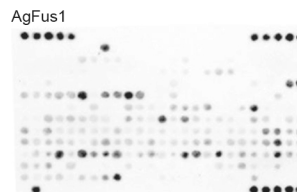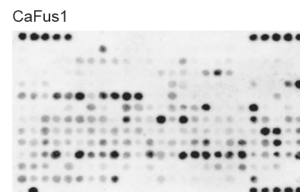

Fus1

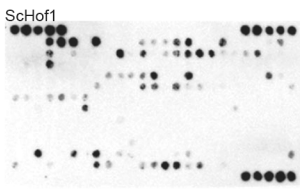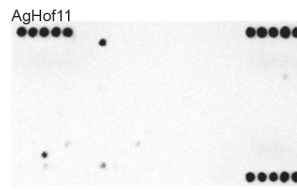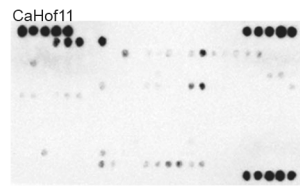

Hof1

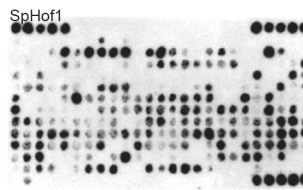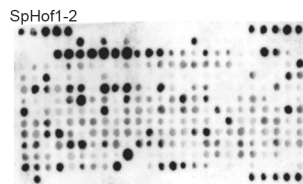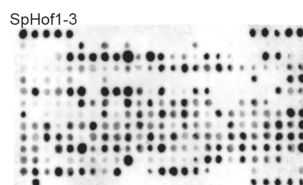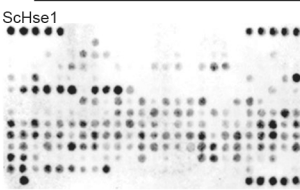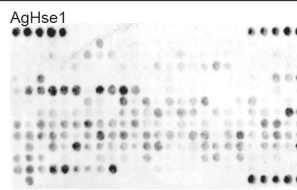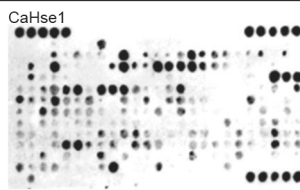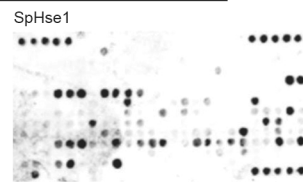

Hse1

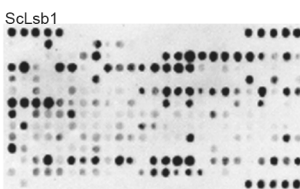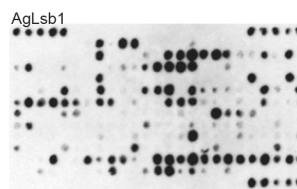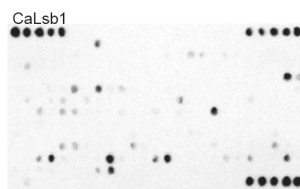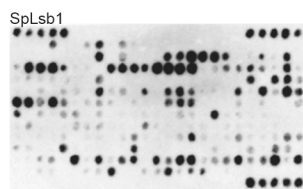

Lsb1

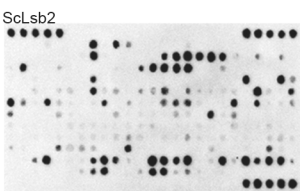

*S. cerevisiae**A. gossypii**C. albicans**S. pombe*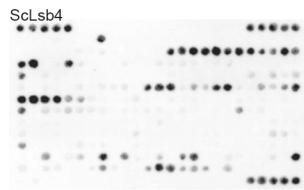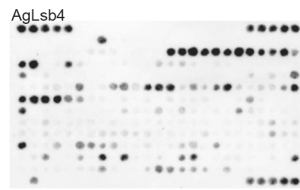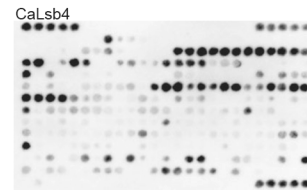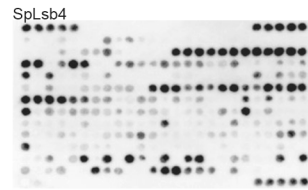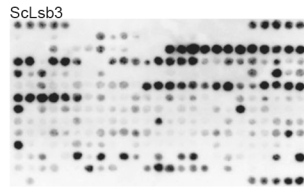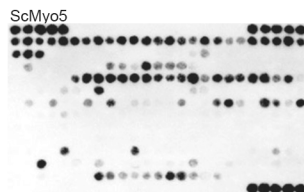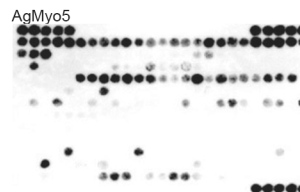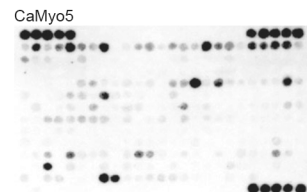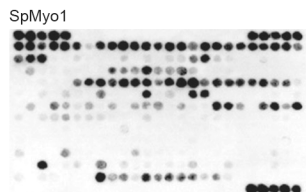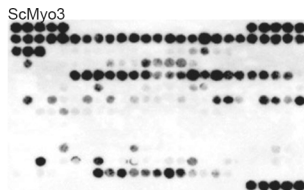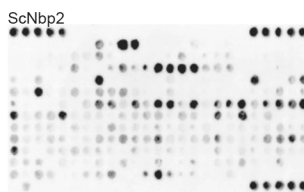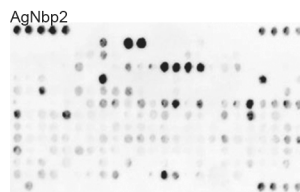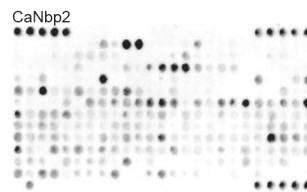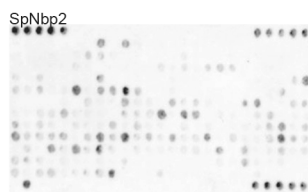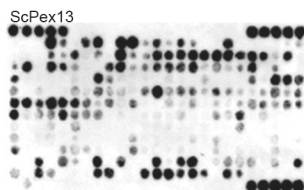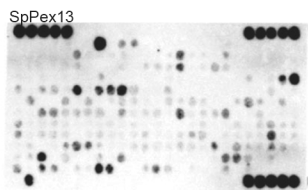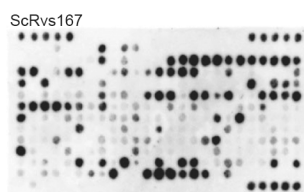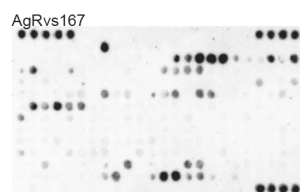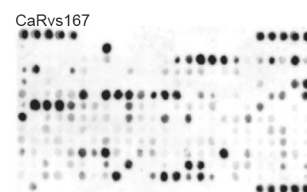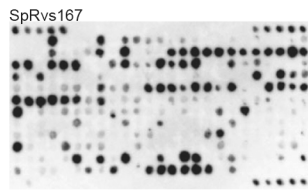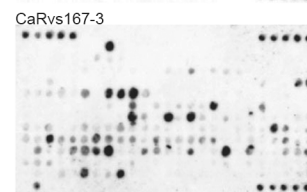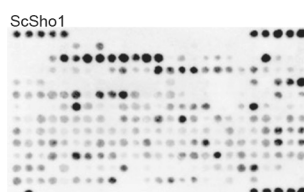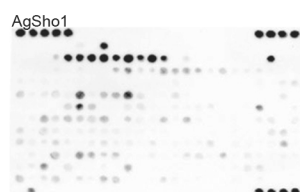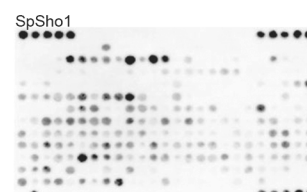

Lsb4

Myo5

Nbp2

Pex13

Rvs167

Sho1

*S. cerevisiae*

*A. gossypii*

*C. albicans*

*S. pombe*

ScSla1-D1-D2

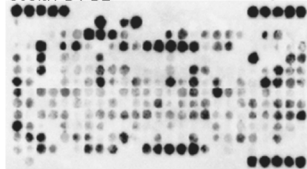

Sla1-  
D1-D2

AgSla1-D1-D2

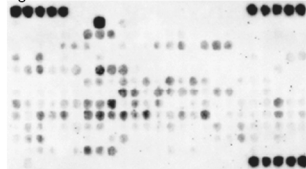

CaSla1-D1-D2

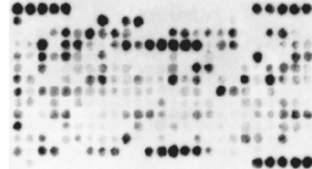

SpSla1-D1-D2

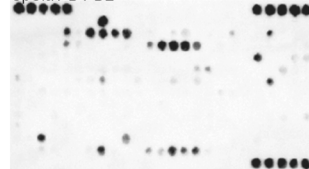

ScSla1-D3

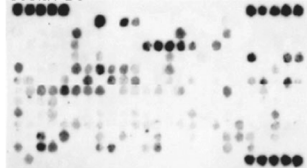

Sla1-D3

AgSla1-D3

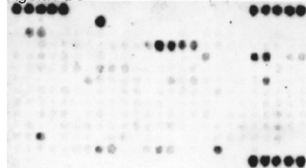

CaSla1-D3

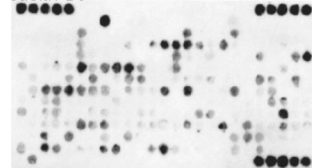

SpSla1-D3

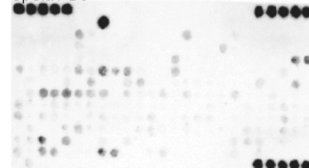

Scp

SpScp1

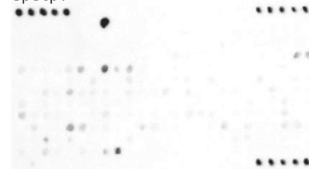

SpScp2

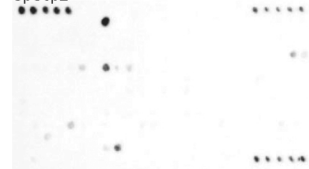

C

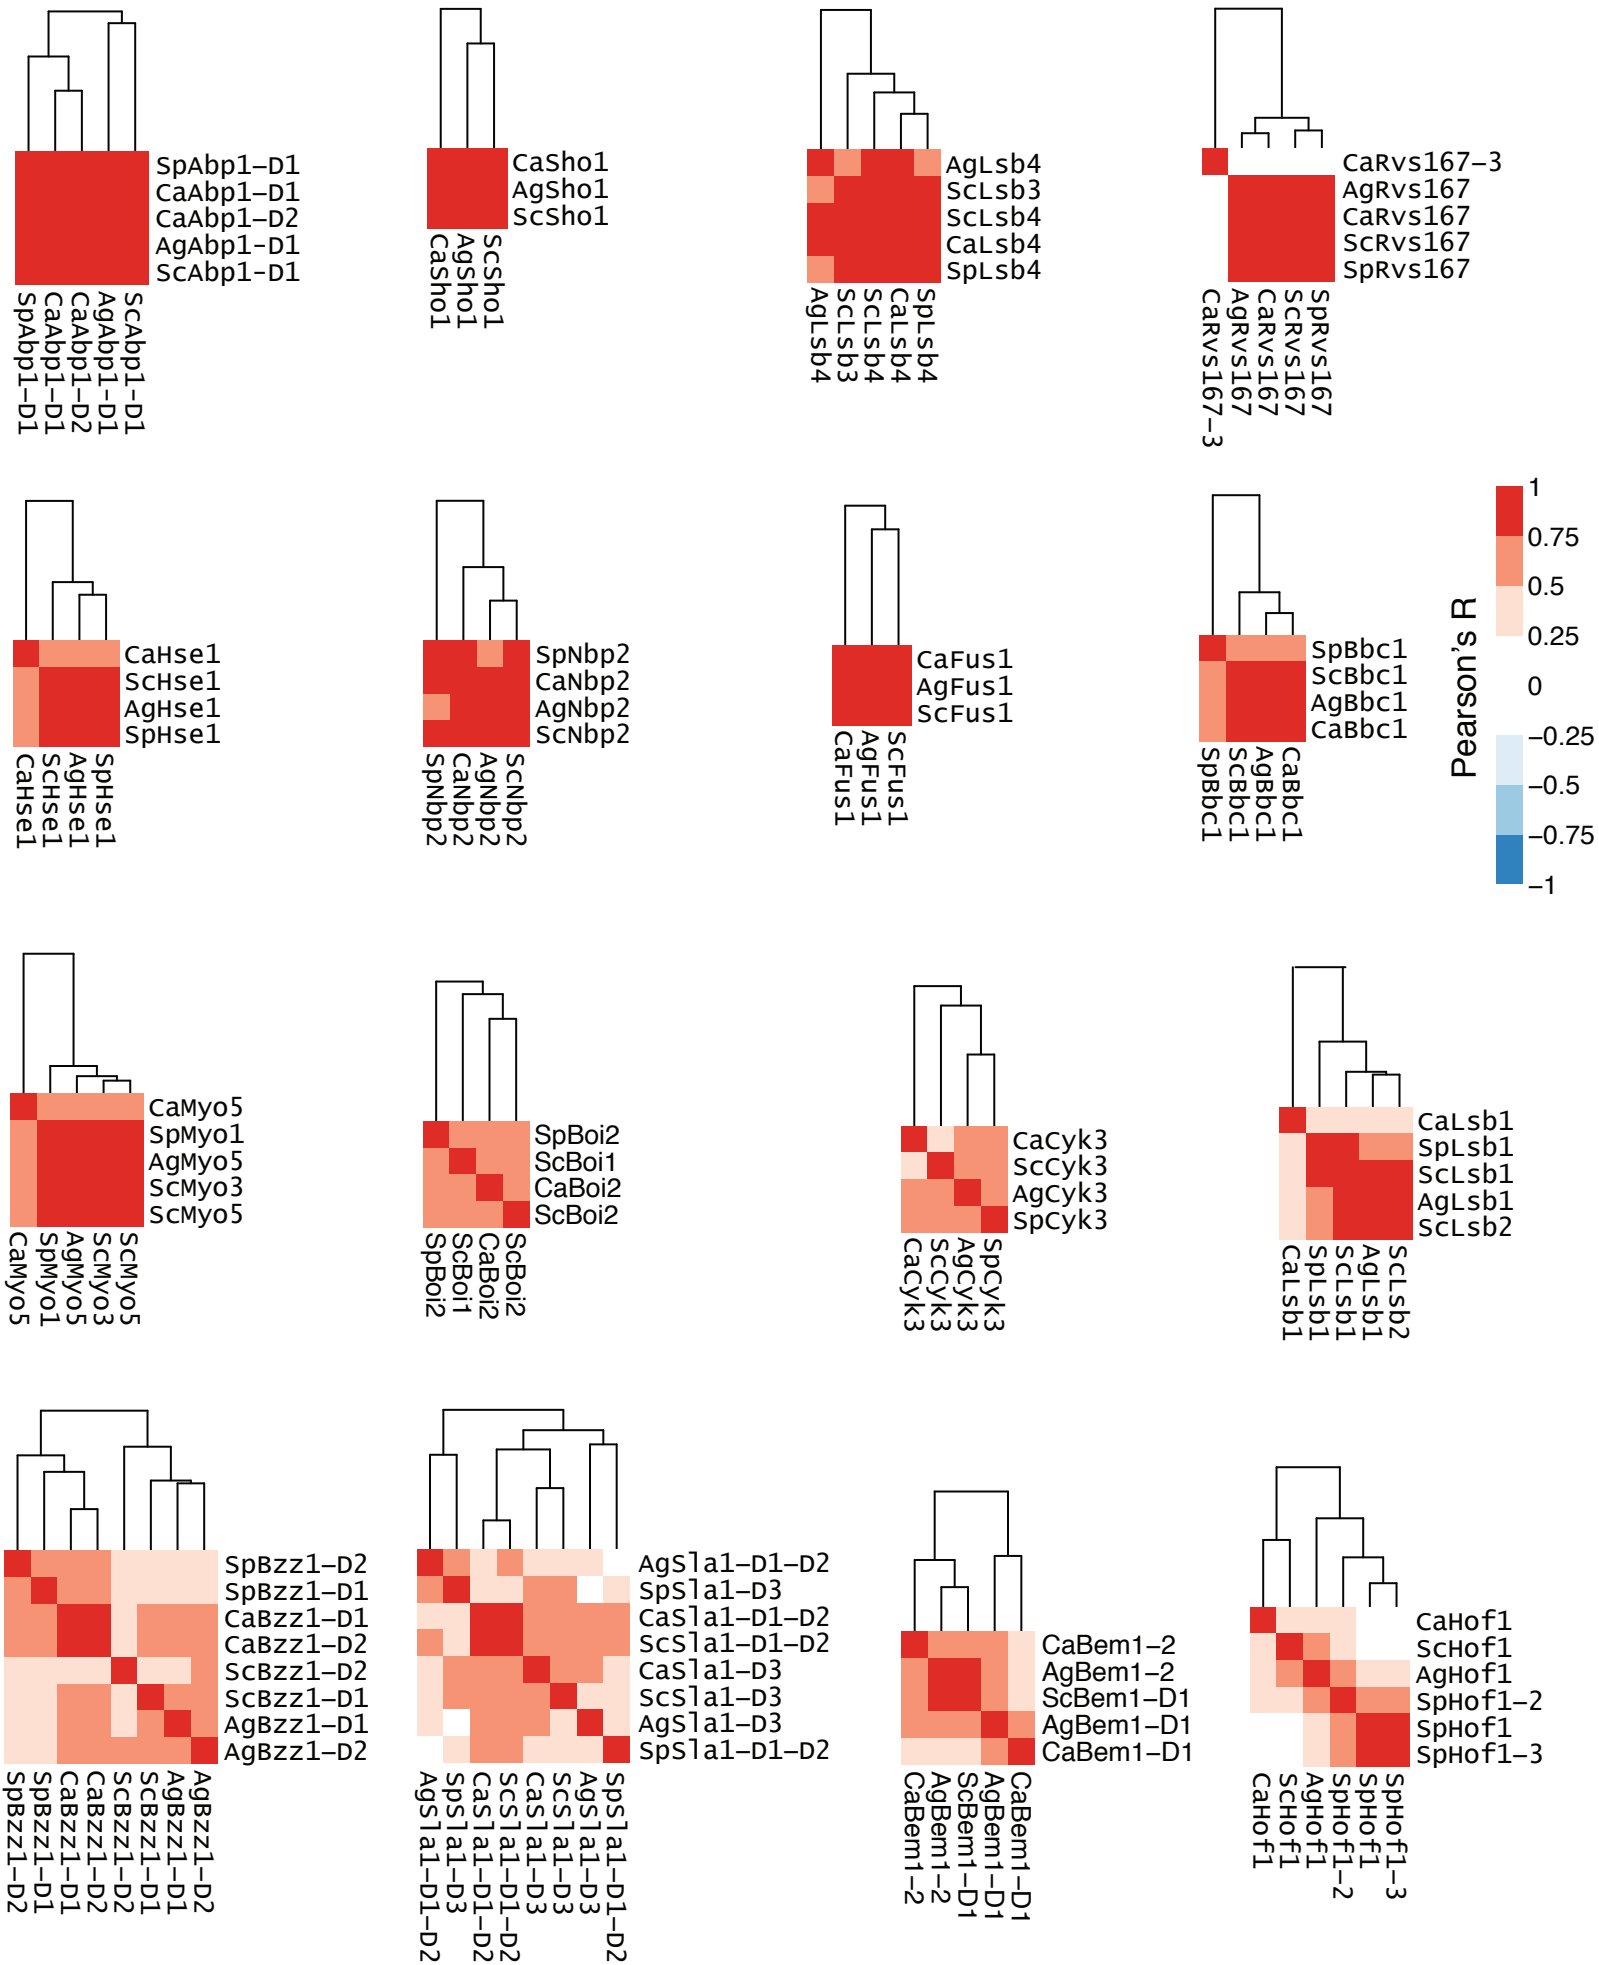

Supplement: pone.0129229.s004.pdf [file pone.0129229.s004.pdf]
