# Supplementary material for: Evolution of the SH3 Domain Specificity Landscape in Yeasts
Source: PubMed Central journal article supplement (PMC4466140; doi:10.1371/journal.pone.0129229), 2015-06-11

Proteins with PFAM domain architecture

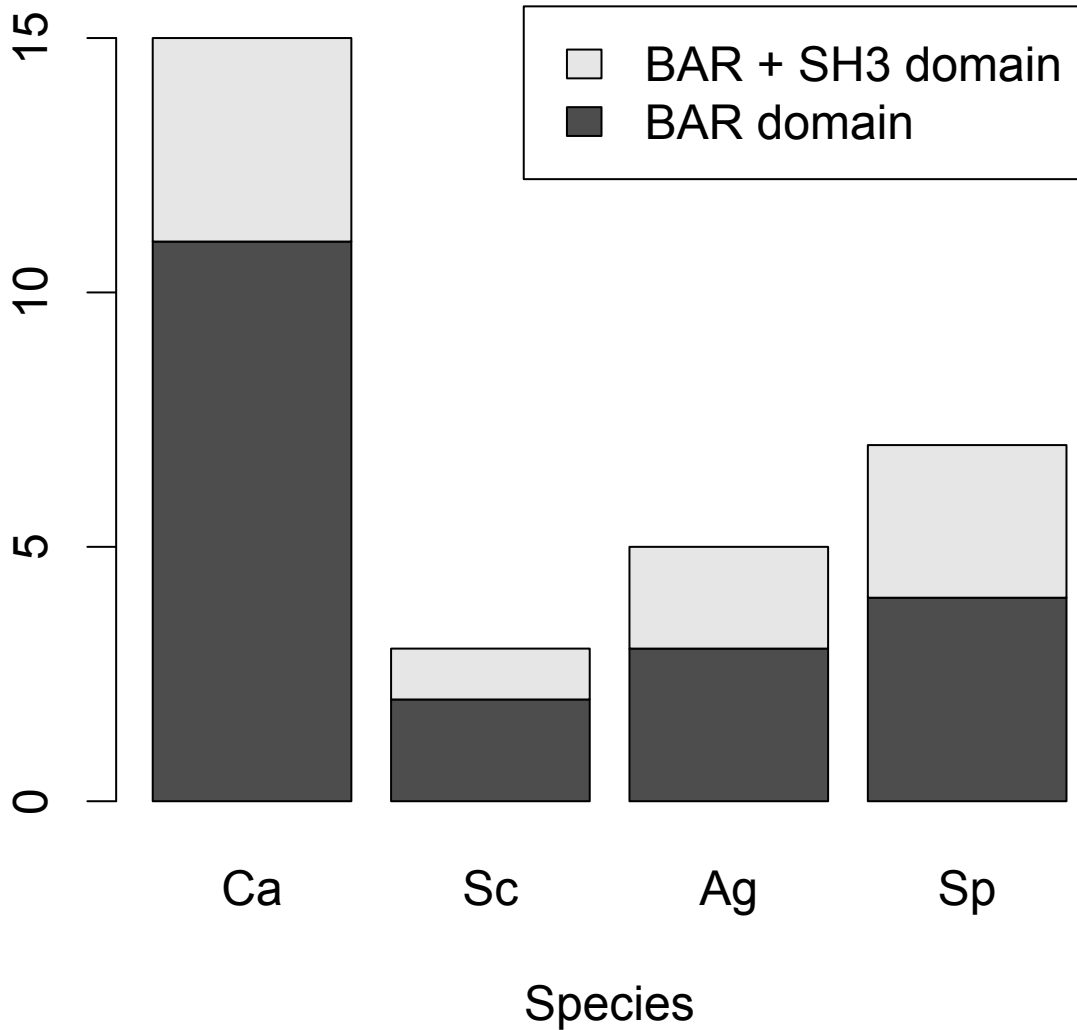

Supplement: pone.0129229.s001.pdf [file pone.0129229.s001.pdf]
