# Supplementary material for: Evolution of the SH3 Domain Specificity Landscape in Yeasts
Source: PubMed Central journal article supplement (PMC4466140; doi:10.1371/journal.pone.0129229), 2015-06-11
Supplement: pone.0129229.s002.pdf [file pone.0129229.s002.pdf]

| Domain                                                                                                                                                                                                                                                                                                                                                                                                                                                                                                                                                                                                                                                                                                                                                                                                                                                                                                                                                                                                                                                                                                                                                                                                                                                                        | hydrophobic motif | polar motif | WPY triad | RT / n- <i>Src</i> loop lengths |
|-------------------------------------------------------------------------------------------------------------------------------------------------------------------------------------------------------------------------------------------------------------------------------------------------------------------------------------------------------------------------------------------------------------------------------------------------------------------------------------------------------------------------------------------------------------------------------------------------------------------------------------------------------------------------------------------------------------------------------------------------------------------------------------------------------------------------------------------------------------------------------------------------------------------------------------------------------------------------------------------------------------------------------------------------------------------------------------------------------------------------------------------------------------------------------------------------------------------------------------------------------------------------------|-------------------|-------------|-----------|---------------------------------|
| <b>Abp1 family</b>                                                                                                                                                                                                                                                                                                                                                                                                                                                                                                                                                                                                                                                                                                                                                                                                                                                                                                                                                                                                                                                                                                                                                                                                                                                            |                   |             |           |                                 |
| AgAbp1-D1                                                                                                                                                                                                                                                                                                                                                                                                                                                                                                                                                                                                                                                                                                                                                                                                                                                                                                                                                                                                                                                                                                                                                                                                                                                                     | YDY               | ELTF        | WPY       | 18 / 4                          |
| ScAbp1-D1                                                                                                                                                                                                                                                                                                                                                                                                                                                                                                                                                                                                                                                                                                                                                                                                                                                                                                                                                                                                                                                                                                                                                                                                                                                                     | YDY               | ELTF        | WPY       | 18 / 4                          |
| CaAbp1-D2                                                                                                                                                                                                                                                                                                                                                                                                                                                                                                                                                                                                                                                                                                                                                                                                                                                                                                                                                                                                                                                                                                                                                                                                                                                                     | YDY               | EIGF        | WPY       | 18 / 4                          |
| CaAbp1-D1                                                                                                                                                                                                                                                                                                                                                                                                                                                                                                                                                                                                                                                                                                                                                                                                                                                                                                                                                                                                                                                                                                                                                                                                                                                                     | YDY               | EIGF        | WPY       | 18 / 4                          |
| SpAbp1-D2                                                                                                                                                                                                                                                                                                                                                                                                                                                                                                                                                                                                                                                                                                                                                                                                                                                                                                                                                                                                                                                                                                                                                                                                                                                                     | YDY               | ELSF        | WPY       | 18 / 4                          |
| SpAbp1-D1                                                                                                                                                                                                                                                                                                                                                                                                                                                                                                                                                                                                                                                                                                                                                                                                                                                                                                                                                                                                                                                                                                                                                                                                                                                                     | YDY               | EIEL        | WPY       | 18 / 4                          |
| <p style="text-align: center;"> <span style="margin-right: 100px;">14</span> <span style="margin-right: 100px;">24</span> <span style="margin-right: 100px;">34</span> <span style="margin-right: 100px;">44</span> <span style="margin-right: 100px;">54</span> </p> <pre> AgAbp1-D1 PTA IAEYDY EAG EDN ELTF E EGDV IVN ID FVDDDDW W LG ELQ KTGQ KGL F P SNYV ELQ Q ScAbp1-D1 PWATAEYDY DAA EDN ELTF V ENDK IIN IEFVDDDDW W LG ELEKDG SKGL F P SNYV SLGN CaAbp1-D2 KTATAEYDY EKDEDN EIGF S EGD L IVE IEFVDDDDW W QGKHSKTG EVGL F P ANYV VLNE CaAbp1-D1 TTATAEYDY EKDEDN EIGF S EGD L IID IEFVDDDDW W QGKHAKTGEVGL F P ATYV SLNE SpAbp1-D2 KSVKAIYDYQ AQ EDN ELSF F EDE I IANVDCVDPN W W EGEC - H - GHRGL F P SNYV EE - I SpAbp1-D1 TPA IV IYDY S PEEEN E IELV EN EQ IQ ILEFVDDGW W LG ENSK - GQQGL F P SNYV EITG </pre>                                                                                                                                                                                                                                                                                                                                                                                                                                                      |                   |             |           |                                 |
| <b>Bbc1 family</b>                                                                                                                                                                                                                                                                                                                                                                                                                                                                                                                                                                                                                                                                                                                                                                                                                                                                                                                                                                                                                                                                                                                                                                                                                                                            |                   |             |           |                                 |
| AgBbc1                                                                                                                                                                                                                                                                                                                                                                                                                                                                                                                                                                                                                                                                                                                                                                                                                                                                                                                                                                                                                                                                                                                                                                                                                                                                        | YTY               | DLNF        | WPY       | 18 / 4                          |
| ScBbc1                                                                                                                                                                                                                                                                                                                                                                                                                                                                                                                                                                                                                                                                                                                                                                                                                                                                                                                                                                                                                                                                                                                                                                                                                                                                        | FPY               | DLSF        | WPF       | 18 / 4                          |
| CaBbc1                                                                                                                                                                                                                                                                                                                                                                                                                                                                                                                                                                                                                                                                                                                                                                                                                                                                                                                                                                                                                                                                                                                                                                                                                                                                        | FDY               | DLNF        | WPF       | 18 / 4                          |
| SpBbc1                                                                                                                                                                                                                                                                                                                                                                                                                                                                                                                                                                                                                                                                                                                                                                                                                                                                                                                                                                                                                                                                                                                                                                                                                                                                        | YPY               | DLEF        | WPF       | 18 / 4                          |
| <p style="text-align: center;"> <span style="margin-right: 100px;">10</span> <span style="margin-right: 100px;">20</span> <span style="margin-right: 100px;">30</span> <span style="margin-right: 100px;">40</span> <span style="margin-right: 100px;">50</span> </p> <pre> AgBbc1 FDV IAKYTY ES IHDG DLNF FEDGQR IEV ISIEDNQW W YYGH FVDGAGNEQ EG I F P KNYV EVAQ ScBbc1 FKVVAQFPYK SDYED DLNF EKDQE I I V T S V E D A E W Y F G E Y Q D S N G D V I E G I F P K S F V A V Q G CaBbc1 MKVKA I FDYK SDYED DLSFDAGT I I N I I S V E N D E W Y S G E Y D - - - G - - K Q G M F P K N F V E E L K SpBbc1 TRVVALY P Y R S S F S D D L E F D P G Q V I D V V S N L D G D W Y T G T Y V D S D G N R K I G S F P K D E T E P A E </pre>                                                                                                                                                                                                                                                                                                                                                                                                                                                                                                                                              |                   |             |           |                                 |
| <b>Bem1 family</b>                                                                                                                                                                                                                                                                                                                                                                                                                                                                                                                                                                                                                                                                                                                                                                                                                                                                                                                                                                                                                                                                                                                                                                                                                                                            |                   |             |           |                                 |
| ScBem1-D1                                                                                                                                                                                                                                                                                                                                                                                                                                                                                                                                                                                                                                                                                                                                                                                                                                                                                                                                                                                                                                                                                                                                                                                                                                                                     | YSY               | ELSF        | WPY       | 18 / 3                          |
| CaBem1-D1                                                                                                                                                                                                                                                                                                                                                                                                                                                                                                                                                                                                                                                                                                                                                                                                                                                                                                                                                                                                                                                                                                                                                                                                                                                                     | YDY               | ELKF        | WPY       | 18 / 13                         |
| SpBem1-D1                                                                                                                                                                                                                                                                                                                                                                                                                                                                                                                                                                                                                                                                                                                                                                                                                                                                                                                                                                                                                                                                                                                                                                                                                                                                     | YDY               | EVSF        | WPH       | 18 / 5                          |
| AgBem1-D1                                                                                                                                                                                                                                                                                                                                                                                                                                                                                                                                                                                                                                                                                                                                                                                                                                                                                                                                                                                                                                                                                                                                                                                                                                                                     | YTY               | ELSF        | WPY       | 18 / 3                          |
| AgBem1-D2                                                                                                                                                                                                                                                                                                                                                                                                                                                                                                                                                                                                                                                                                                                                                                                                                                                                                                                                                                                                                                                                                                                                                                                                                                                                     | YDF               | ELSA        | WPF       | 18 / 4                          |
| CaBem1-D2                                                                                                                                                                                                                                                                                                                                                                                                                                                                                                                                                                                                                                                                                                                                                                                                                                                                                                                                                                                                                                                                                                                                                                                                                                                                     | YEF               | ELDI        | WPY       | 18 / 4                          |
| ScBem1-D2                                                                                                                                                                                                                                                                                                                                                                                                                                                                                                                                                                                                                                                                                                                                                                                                                                                                                                                                                                                                                                                                                                                                                                                                                                                                     | YDF               | ELTT        | WPF       | 18 / 4                          |
| SpBem1-D2                                                                                                                                                                                                                                                                                                                                                                                                                                                                                                                                                                                                                                                                                                                                                                                                                                                                                                                                                                                                                                                                                                                                                                                                                                                                     | FDF               | ELEA        | WPF       | 18 / 4                          |
| CaBem1-2                                                                                                                                                                                                                                                                                                                                                                                                                                                                                                                                                                                                                                                                                                                                                                                                                                                                                                                                                                                                                                                                                                                                                                                                                                                                      | YDF               | EISV        | WPY       | 18 / 4                          |
| AgBem1-2                                                                                                                                                                                                                                                                                                                                                                                                                                                                                                                                                                                                                                                                                                                                                                                                                                                                                                                                                                                                                                                                                                                                                                                                                                                                      | QDY               | FLNV        | LPC       | no model produced               |
| <p style="text-align: center;"> <span style="margin-right: 100px;">37</span> <span style="margin-right: 100px;">47</span> <span style="margin-right: 100px;">57</span> <span style="margin-right: 100px;">67</span> <span style="margin-right: 100px;">77</span> <span style="margin-right: 100px;">87</span> <span style="margin-right: 100px;">97</span> </p> <pre> ScBem1-D1 KV IAKY SYQAQTSK-----ELSFMEGEFFVYVSG-DEK-----DWYKASNPST-GKEGVVPKTYFEVFD CaBem1-D1 KV IRLYDYEPQGGP-----ELKFFKGDFFHV LDDVDELHKEAEANGWIEATNPMT-QLKGMVPISYFEIFD AgBem1-D1 IILKALYTYHAQSPG-----ELSFNKGELFQVNG-EDG-----EWYEVSTEG-GRKGMVPSYFEQVS SpBem1-D1 KV IRLYDY TARKAT-----EVSFAKGDFFHV IGR END-----KAWYEVCPAA-GTRGFVPVSHFEEIG AgBem1-D2 LYAIVLYDFKAEKSD-----ELSAFAGENLFICAHHNFE-----WFIAKP IGR LGGPGLVPGFVSIID CaBem1-D2 LYAVTLYEFKAERDD-----ELDIMPENL IICAHHDYE-----WFIAKP INR LGGPGLVPSVVKIID ScBem1-D2 LYAIVLYDFKAEKAD-----ELTTYVGENLFICAHHNCE-----WFIAKP IGR LGGPGLVPGFVSIID SpBem1-D2 LFGIVQDFFAAERPD-----ELEAKAGEA I I I IAR SNHE-----WLVAKP IGR LGGPG L I P L S F I Q L R D CaBem1-2 VILVTKYDFVAEGEN-----EISV NKGDLVKLIDRLGNG-----WLVVKYIDRVQPPGLIPASVVDIAV AgBem1-2 LYYNVVDYFLPNSEEDAAGRRGFLNVRRRGD I V L H L E Q A E N N-----L V Y V K L M N M - L G E G L V P A R C L A V N R </pre> |                   |             |           |                                 |

| Domain                                                                                                                                                                                                                                                                                                                                                                                                                                                                                                                                                                                                                                                                 | hydrophobic motif | polar motif | WPY triad | RT / n-Src loop lengths |
|------------------------------------------------------------------------------------------------------------------------------------------------------------------------------------------------------------------------------------------------------------------------------------------------------------------------------------------------------------------------------------------------------------------------------------------------------------------------------------------------------------------------------------------------------------------------------------------------------------------------------------------------------------------------|-------------------|-------------|-----------|-------------------------|
| <b>Boi2 family</b>                                                                                                                                                                                                                                                                                                                                                                                                                                                                                                                                                                                                                                                     |                   |             |           |                         |
| AgBoi2                                                                                                                                                                                                                                                                                                                                                                                                                                                                                                                                                                                                                                                                 | NEY               | DELD        | WPF       | 18 / 8                  |
| ScBoi2                                                                                                                                                                                                                                                                                                                                                                                                                                                                                                                                                                                                                                                                 | NEY               | DELD        | WPF       | 18 / 8                  |
| ScBoi1                                                                                                                                                                                                                                                                                                                                                                                                                                                                                                                                                                                                                                                                 | NQY               | DELN        | WPF       | 18 / 8                  |
| CaBoi2                                                                                                                                                                                                                                                                                                                                                                                                                                                                                                                                                                                                                                                                 | KQF               | DELS        | WPF       | 18 / 8                  |
| SpBoi2                                                                                                                                                                                                                                                                                                                                                                                                                                                                                                                                                                                                                                                                 | HSF               | DELP        | WPH       | 18 / 8                  |
| <pre> AgBoi2   GTY IA INEY SKRM EDELD MKKPGDK IEV ITDDQ EYNDGWY FGRN LRTGEEGLY PKLFTQ ELS ScBoi2   PMY IA INEY FKRM EDELD MKKPGDK IKV ITDDEEYKDGWY FGRN LRTNEEGLY PVVFTQ K IT ScBoi1   PLY IAVNQY SKRM EDELN MKKPGDK IKV ITDDGEYNDGWY YGRN LRTKEEGLY PAVFTKR IA CaBoi2   DTY IC IKQFNAR LGDELS LK IGDK IQV LADDR EYNDGWY MGKN LLLTGEAGLY PKTFTQ L IT SpBoi2   R FV IALHSF PGKSSDELP LV EGRK YLL IKM DEEFGDGWY WEGEDE -QGNRG IFPA SHVEL IS </pre>                                                                                                                                                                                                                       |                   |             |           |                         |
| <b>Bud14 family</b>                                                                                                                                                                                                                                                                                                                                                                                                                                                                                                                                                                                                                                                    |                   |             |           |                         |
| AgBud14                                                                                                                                                                                                                                                                                                                                                                                                                                                                                                                                                                                                                                                                | YAF               | HCRL        | WPI       | 18 / 5                  |
| CaBud14                                                                                                                                                                                                                                                                                                                                                                                                                                                                                                                                                                                                                                                                | YDF               | HCTL        | WPC       | 18 / 5                  |
| ScBud14                                                                                                                                                                                                                                                                                                                                                                                                                                                                                                                                                                                                                                                                | YAF               | HCQL        | WPI       | 18 / 5                  |
| SpBud14                                                                                                                                                                                                                                                                                                                                                                                                                                                                                                                                                                                                                                                                | RGF               | QVDA        | WPY       | 18 / 5                  |
| <pre> AgBud14   GKLYA LYAFQ GPDPSHCRLEPDESC ILLNDQDSYMWLVKRC-----GDGK IGFA PAEILETFP CaBud14   DKLYGLYDFSGPDP SHCTLSVDEPVY LIND EDNYMWLIRK LTKLERLKRMLNGQ EFQ ID IESDEEDGK IGFVPAECLETHG ScBud14   DKLYA LYAFNGHDSHCQLGQDEPC ILLNDQDAYMWLVKRI-----TDGK IGFA PAEILETFP SpBud14   N FVHA TRGF EATVEGQVDA TKGDMM ILLDDSNSYMWLVKMC-----KNLA IGYLPAEYIETPS </pre>                                                                                                                                                                                                                                                                                                           |                   |             |           |                         |
| <b>Bzz1 family</b>                                                                                                                                                                                                                                                                                                                                                                                                                                                                                                                                                                                                                                                     |                   |             |           |                         |
| AgBzz1-D1                                                                                                                                                                                                                                                                                                                                                                                                                                                                                                                                                                                                                                                              | FPY               | EVTI        | WPY       | 18 / 5                  |
| ScBzz1-D1                                                                                                                                                                                                                                                                                                                                                                                                                                                                                                                                                                                                                                                              | YAY               | EITI        | WPY       | 18 / 5                  |
| AgBzz1-D2                                                                                                                                                                                                                                                                                                                                                                                                                                                                                                                                                                                                                                                              | YDY               | EISI        | WPY       | 18 / 5                  |
| CaBzz1-D1                                                                                                                                                                                                                                                                                                                                                                                                                                                                                                                                                                                                                                                              | YDY               | ETTI        | WPY       | 18 / 5                  |
| ScBzz1-D2                                                                                                                                                                                                                                                                                                                                                                                                                                                                                                                                                                                                                                                              | YAY               | EISI        | WPY       | 18 / 5                  |
| CaBzz1-D2                                                                                                                                                                                                                                                                                                                                                                                                                                                                                                                                                                                                                                                              | YDY               | EISI        | WPY       | 18 / 6                  |
| SpBzz1-D1                                                                                                                                                                                                                                                                                                                                                                                                                                                                                                                                                                                                                                                              | YDF               | VITA        | WPY       | 18 / 5                  |
| SpBzz1-D2                                                                                                                                                                                                                                                                                                                                                                                                                                                                                                                                                                                                                                                              | YAY               | ELSI        | WPY       | 18 / 5                  |
| <pre> AgBzz1_1   GGNRV LFPYTKQDED EVTIAPGNS IVLLRQD -DGS GWVVK IRNASTQQ EGLV P STYVEINE ScBzz1_1   GKNKVL YAVVQKDDD EITITPGDK ISLVARD -TGS GWTK INNDTTGETGLV PTTYIRISS AgBzz1_2   -KVTA IYDYSAQDDD EISIRAGDV IKVLRGD -TGNGW TYGEV--NG SKGLFP SNYC---N CaBzz1_1   IQARA LYDYTAAGSD ETTIVAGDQ LSV IEED -DGS GWTMVNGP--QGQ GLVPTS YIEIT S ScBzz1_2   RTMEA IYAYEAQGDD EISIDPGDIITV IRGD -DGS GWTYGEC--GLKGLFP TSYC---K CaBzz1_2   QYLEA LYDYTAGDDE ISITAGDR IVLVQDDTDGS GWTEGELN--GQTGM FPTS YVKK- I SpBzz1_1   VDGVV LYDFTGEHEG VITASEGQ EFTLLEPD -DGS GWVRVK ID--GTDGL IPAS YVKLND SpBzz1_2   S-VKA LYAYTAQSDM ELSIQEGDI IQVTNRN -AGNGW SEGIL--NGVTGQ FAN YVTD-V </pre> |                   |             |           |                         |

| Domain                                                                                                                                                                                                                                                                                                                                                                                                                                                                                                                                                                                             | hydrophobic motif | polar motif | WPY triad | RT / n-Src loop lengths |
|----------------------------------------------------------------------------------------------------------------------------------------------------------------------------------------------------------------------------------------------------------------------------------------------------------------------------------------------------------------------------------------------------------------------------------------------------------------------------------------------------------------------------------------------------------------------------------------------------|-------------------|-------------|-----------|-------------------------|
| <b>Cdc25 family</b>                                                                                                                                                                                                                                                                                                                                                                                                                                                                                                                                                                                |                   |             |           |                         |
| AgCdc25                                                                                                                                                                                                                                                                                                                                                                                                                                                                                                                                                                                            | CDF               | HLPL        | WPY       | 18 / 3                  |
| CaCdc25                                                                                                                                                                                                                                                                                                                                                                                                                                                                                                                                                                                            | YDF               | HLPL        | WPY       | 18 / 3                  |
| SpCdc25                                                                                                                                                                                                                                                                                                                                                                                                                                                                                                                                                                                            | SDY               | FLKF        | WPC       | 19 / 3                  |
| ScCdc25                                                                                                                                                                                                                                                                                                                                                                                                                                                                                                                                                                                            | YDF               | LLSV        | WPF       | 23 / 3                  |
| CaCdc25-2                                                                                                                                                                                                                                                                                                                                                                                                                                                                                                                                                                                          | HSF               | CLSF        | WPY       | 25 / 3                  |
| AgCdc25-2                                                                                                                                                                                                                                                                                                                                                                                                                                                                                                                                                                                          | HAF               | CLSF        | WPY       | 25 / 3                  |
| <pre> AgCdc25  DVVRA L CDFVPLK-----KQH LPLKAGDVVYVLSRHESG W CDG IIEEQ TAKGNSTVTQCQRGW FPR T Y TRS IR CaCdc25  DTV IAL YDFP GTQ-----SSH LPLNLGDT IHVLSK SATG W WDG VVMGN-----SG ELQRGW FPHN Y VR SVN SpCdc25  FQTTA I SDYENSS-----NPS FLKFSAGDT IIV IEVLEDG W CDG ICSE-----KRGW FPTS C IDSSK ScCdc25  GIVVAA YDFNYP IKKD--SSSQ LLSVQQGET IY ILNKNSSG W WDG LV IDD-----SNG KVNRRGW FPN FGRPLR CaCdc25-2 FFIRAL HSFDSSTLQSKSDAS ICLSF EKNDIA FLHT IDESG W GEVTLLE-----TLQ TGW IPM NY FSLV AgCdc25-2 LFIVS I HAFD SQ ILENK EDAT ICLSF EKNELA FVHTVDES G W GEVTLVK-----SGRRGW VPFNY FADVV </pre>        |                   |             |           |                         |
| <b>Cyk3 family</b>                                                                                                                                                                                                                                                                                                                                                                                                                                                                                                                                                                                 |                   |             |           |                         |
| AgCyk3                                                                                                                                                                                                                                                                                                                                                                                                                                                                                                                                                                                             | YGW               | DLGF        | WPY       | 18 / 3                  |
| ScCyk3                                                                                                                                                                                                                                                                                                                                                                                                                                                                                                                                                                                             | YGW               | DLGF        | WPF       | 18 / 3                  |
| CaCyk3                                                                                                                                                                                                                                                                                                                                                                                                                                                                                                                                                                                             | VSW               | DLGF        | WPY       | 18 / 4                  |
| SpCyk3                                                                                                                                                                                                                                                                                                                                                                                                                                                                                                                                                                                             | YAW               | DLKF        | WPF       | 18 / 4                  |
| <pre> AgCyk3  FKVKAV YSW SG EHEQ D LG F LESD IIEVTK -VKGN W LYGRLL-RNKKSGY F FVNY VQVLY ScCyk3  FKVKARY YGW SGQTKGD LG F LEGD IM EVTR -IAGSW FYGKLLRNKKCSGY FPHN FVILLE CaCyk3  FKVKT IVSW AGE EEGD LG F MENEIVQVFSIVDES W WSGKLR-RNGAEG I FPKDYVTILE SpCyk3  CMVRA LYAW PGEREGD LK F TEGDL IECLS IGDGK W W IGRHI-NTNTQG I FFSN FVHCLD </pre>                                                                                                                                                                                                                                                      |                   |             |           |                         |
| <b>Fus1 family</b>                                                                                                                                                                                                                                                                                                                                                                                                                                                                                                                                                                                 |                   |             |           |                         |
| ScFus1                                                                                                                                                                                                                                                                                                                                                                                                                                                                                                                                                                                             | QDY               | DEIR        | WPC       | 18 / 5                  |
| AgFus1                                                                                                                                                                                                                                                                                                                                                                                                                                                                                                                                                                                             | KPF               | DEIE        | WPC       | 18 / 5                  |
| CaFus1                                                                                                                                                                                                                                                                                                                                                                                                                                                                                                                                                                                             | RSY               | DELN        | WPC       | 18 / 5                  |
| <pre> ScFus1  KTYTV IQDY EPRLT DEIR ISLGEKVK ILATHD G W CLVEKCNTRKGT IH--VSVDKRY LNERG IVP GD C LQ EYD AgFus1  DLCVV IKP FSPRLD EIE LN IDEQVRV LARHTD G W CLVEKCD SAK SADSDSDN ISAPNY LNERG IVP QM C LKHVF CaFus1  SLYTV I RSYNK SLG DELN IEVGDKAV ILEKHS D G W CKIRLV RMGKDYNN-----HQ LSSD IGLV P KM C LQ --K </pre>                                                                                                                                                                                                                                                                              |                   |             |           |                         |
| <b>Hof1 family</b>                                                                                                                                                                                                                                                                                                                                                                                                                                                                                                                                                                                 |                   |             |           |                         |
| ScHof1                                                                                                                                                                                                                                                                                                                                                                                                                                                                                                                                                                                             | YPL               | LANF        | WPF       | 19 / 4                  |
| AgHof1                                                                                                                                                                                                                                                                                                                                                                                                                                                                                                                                                                                             | YSF               | ILYF        | WPY       | 19 / 4                  |
| SpHof1-2                                                                                                                                                                                                                                                                                                                                                                                                                                                                                                                                                                                           | YDY               | EISF        | WPF       | 18 / 4                  |
| SpHof1-3                                                                                                                                                                                                                                                                                                                                                                                                                                                                                                                                                                                           | YAY               | EIDL        | WPY       | 18 / 4                  |
| SpHof1                                                                                                                                                                                                                                                                                                                                                                                                                                                                                                                                                                                             | YDY               | EISF        | WPF       | 18 / 4                  |
| CaHof1                                                                                                                                                                                                                                                                                                                                                                                                                                                                                                                                                                                             | YSF               | ELYF        | WPY       | 18 / 4                  |
| <pre> ScHof1  EYAKAM YPL IGNEAP G LAN F H KGDYLLITE IVNKD W YKGEVYDNDRIDRNHR IGL IPYN F IQLLH AgHof1  GYARA IY SFT EPNDND ILY F EMGDHLLLEK LNTD W Y IGEVHN-----GNGKQL IPMN Y V ELLS SpHof1-2 GYV IAL YDY Q AQ I-PE E IS F Q KGD TLMV LRTQ EDG W W DGE I INV-----PNSKRGLF P SN FVQ --T SpHof1-3 A YVRA LYAY KATL-P S E ID L NVDDT LVV LNRQ KDG W W KGLV VSP-----TVGR IGL F P SN Y IEELE SpHof1  GYV SA LYDY DAA I-PE E IS F R KGD T IAV LK LY EDG W W EG FVVG E-----DDHNRGQ F P SN F VREIE CaHof1  TKA IARY S F K PQT-EG ELY F K KGW KMY I IHKQ EDN W W FVC ELGDNCL-Q SSGM IGLV P GNY I VEGD </pre> |                   |             |           |                         |
| <b>Hse1 family</b>                                                                                                                                                                                                                                                                                                                                                                                                                                                                                                                                                                                 |                   |             |           |                         |
| AgHse1                                                                                                                                                                                                                                                                                                                                                                                                                                                                                                                                                                                             | FDL               | ELSF        | WPY       | 18 / 4                  |
| ScHse1                                                                                                                                                                                                                                                                                                                                                                                                                                                                                                                                                                                             | YDL               | ELSF        | WPF       | 18 / 4                  |
| CaHse1                                                                                                                                                                                                                                                                                                                                                                                                                                                                                                                                                                                             | YDL               | ELSF        | WPY       | 18 / 4                  |
| SpHse1                                                                                                                                                                                                                                                                                                                                                                                                                                                                                                                                                                                             | YDF               | ELSF        | WPF       | 18 / 4                  |
| <pre> AgHse1  RRVKA I FDL NASEPD ELSF K KGDV ITV IEQVYKD W W RGLLR-GKVG I F P VNY VGVCP ScHse1  RRVRA LYDL TTN EPD ELSF R KGDV ITV LEQVYRD W W KGA LR-GNMG I F P LNY VTP IV CaHse1  SKVRA LYDL VSY EPD ELSF R KGDV ITV IESVYRD W W RGS LPSGK IG I F P LNY VTP IV SpHse1  SRVRA LYD F AAT EQ G ELSF K KGD IILV LESVYKD W W KGSCK-NAVG I F P VNY VQ RVV </pre>                                                                                                                                                                                                                                       |                   |             |           |                         |

| Domain              | hydrophobic motif                                                                                                               | polar motif | WPY triad | RT / n-Src loop lengths |
|---------------------|---------------------------------------------------------------------------------------------------------------------------------|-------------|-----------|-------------------------|
| <b>Lsb1 family</b>  |                                                                                                                                 |             |           |                         |
| AgLsb1              | YAF                                                                                                                             | DLDF        | WPY       | 18 / 4                  |
| ScLsb2              | YQF                                                                                                                             | DLGL        | WPY       | 18 / 4                  |
| ScLsb1              | YDF                                                                                                                             | DLSL        | WPY       | 18 / 4                  |
| CaLsb1              | YDY                                                                                                                             | DLDL        | WPY       | 18 / 4                  |
| SpLsb1              | YDF                                                                                                                             | DLGF        | WPY       | 18 / 4                  |
| AgLsb1              | EYV E A L Y A F Q A Q Q P G D L D F K V G E K I E V L E K P S P E W Y K G R - - - - C N G K V G M F P S N Y V K P A F           |             |           |                         |
| ScLsb2              | EYV E A L Y Q F D P Q Q D G D L G L K P G D K V Q L L E K L S P E W Y K G S - - - - C N G R T G I F P A N Y V K P A F           |             |           |                         |
| ScLsb1              | EYV E A L Y D F E A Q Q D G D L S L K T G D K I Q V L E K I S P D W Y R G K - - - - S N N K I G I F P A N Y V K P A F           |             |           |                         |
| CaLsb1              | G Y C I A T Y D Y K A Q Q A G D L D L S K G D K L A V V E H L S E D W W K G Y K S D S S P E K T G V F P S N Y V K I I S         |             |           |                         |
| SpLsb1              | E R V L A M Y D F P G P D A G D L G F H A G E V I I V L E H V N N D W W R G E - - - - L N G K E G I F P S N Y V R L L E         |             |           |                         |
| <b>Lsb4 family</b>  |                                                                                                                                 |             |           |                         |
| AgLsb4              | YTF                                                                                                                             | DLPF        | WPY       | 18 / 7                  |
| ScLsb3              | YSF                                                                                                                             | DLPF        | WPY       | 18 / 7                  |
| CaLsb4              | YTF                                                                                                                             | DLPF        | WPY       | 18 / 7                  |
| ScLsb4              | YNF                                                                                                                             | DIAF        | WPY       | 18 / 7                  |
| SpLsb4              | YSF                                                                                                                             | DLSF        | WPY       | 18 / 7                  |
| AgLsb4              | P K A V A L Y T F K G E Q K G D L P F R K G D V I M I L K R T E S Q D D W W T G R I N G Q E G I F P A N Y V D L V               |             |           |                         |
| ScLsb3              | P K A V A L Y S F A G E E S G D L P F R K G D V I T I L K K S D S Q N D W W T G R V N G R E G I F P A N Y V E L V               |             |           |                         |
| CaLsb4              | T Q A I A L Y T F K G E Q S G D L P F K K G D V I D I L K K T D T I D D W W T G R N N G L T G I F P A N Y V E L I               |             |           |                         |
| ScLsb4              | P T A V A L Y N F A G E Q P G D L A F K K G D V I T I L K K S D S Q N D W W T G R T N G K E G I F P A N Y V R V S               |             |           |                         |
| SpLsb4              | N Q A R A M Y S F A G E Q P G D L S F K K G D I I D I V E R S G S H D D W W T G R I G Y R E G I F P A N Y V K L S               |             |           |                         |
| <b>Myo5 family</b>  |                                                                                                                                 |             |           |                         |
| AgMyo5              | YDF                                                                                                                             | ELPL        | WPY       | 19 / 3                  |
| CaMyo5              | YDF                                                                                                                             | EMTI        | WPY       | 18 / 2                  |
| ScMyo5              | YDF                                                                                                                             | ELPL        | WPY       | 19 / 3                  |
| ScMyo3              | FDY                                                                                                                             | SPL         | WPY       | 19 / 3                  |
| SpMyo1              | FDF                                                                                                                             | ELPL        | WPY       | 18 / 3                  |
| AgMyo5              | P V Y E A A F D F P G S G S P N E F P L K K G D R I Y - V T R Q E P S G - W S L A K A L D G S K E G W V P T A Y I V E S K       |             |           |                         |
| ScMyo5              | P M F E A A Y D F P G S G S P S E L P L K K G D V I Y - I T R E E P S G - W S L G K L L D G S K E G W V P T A Y M K P H S       |             |           |                         |
| ScMyo3              | P K F E A A Y D F P G S G S S S E L P L K K G D I V F - I S R D E P S G - W S L A K L L D G S K E G W V P T A Y M T P Y K       |             |           |                         |
| SpMyo1              | D L Y L A L Y D F A G R - S P N E M T I K K - D E I I E I V Q K E P S G - W W L A L K N - - G A E G W V P A T Y V T E Y K       |             |           |                         |
| CaMyo5              | P T Y K A M F D Y D G S - V A G S I P L V K - D T I Y Y V T - - Q V N G K W G L V K T M D E T K E G W S P I D Y L K E C S       |             |           |                         |
| Text                |                                                                                                                                 |             |           |                         |
| <b>Nbp2 family</b>  |                                                                                                                                 |             |           |                         |
| AgNbp2              | YDF                                                                                                                             | ELEL        | WPY       | 18 / 5                  |
| ScNbp2              | YDF                                                                                                                             | ELRL        | WPF       | 18 / 5                  |
| CaNbp2              | FDF                                                                                                                             | EISL        | WPY       | 18 / 5                  |
| SpNbp2              | YDF                                                                                                                             | ELGF        | WPF       | 18 / 5                  |
| AgNbp2              | K H A W A L Y D F V P E N D N E L E L Q E G S I V Y I - S Y K H G Q G W L V A E D S A R T R T G L V P E E Y V S I L E           |             |           |                         |
| ScNbp2              | Q R A V A L Y D F E P E N D N E L R L A E G D I V F I - S Y K H G Q G W L V A E N E S G S K T G L V P E E F V S Y I Q           |             |           |                         |
| CaNbp2              | C K A R A I F D F S A E N D N E I S L I E G Q I I W I - S Y R H G Q G W L V A E D P I S G E N G L V P E E Y V E I M Q           |             |           |                         |
| SpNbp2              | A D A V A L Y D F E P L H D N E L G F T T G Q R L C I L S E S S D - G W L I A Y D D A S G R S G L V P E T E V K L E V           |             |           |                         |
| <b>Pex13 family</b> |                                                                                                                                 |             |           |                         |
| ScPex13             | YDF                                                                                                                             | EVAL        | WPY       | 19 / 10                 |
| CaPex13             | YEF                                                                                                                             | EAPL        | WPY       | 19 / 4                  |
| AgPex13             | YDF                                                                                                                             | ECAL        | WPY       | 19 / 10                 |
| SpPex13             | YEF                                                                                                                             | EMSL        | WPY       | 19 / 10                 |
| ScPex13             | L E F A R A L Y D F V P E N P E M E V A L K K G D L M A I L S K K D P L G R D S D W W K V R T K N G N I G Y I P Y N Y I E I I K |             |           |                         |
| CaPex13             | I Q F A R A L Y E F N P Q N P Q V E A P L E P K E I V A I L D S R D - - - - - N W L R I R K R S G T M G W V P S N Y V E V I D   |             |           |                         |
| AgPex13             | L E F A R A I Y D F T P E N P R I E C A L K K G D L M A I I S R Q D P T G K E S Q W W K V R T K K G D V G Y V P C N Y I E L I R |             |           |                         |
| SpPex13             | L E F C K A D Y E F M S R D P G V E M S L K K G D I I A I L S K T D T Q G N P C E W W Q G R K R S G E T G W F P S N Y C S I I S |             |           |                         |

| Domain                                                                                                                                                                                                                                                                                                                                                                                                                                                                                                                                                                                                                                                                                                                                                                                                                                                                                                                                                                                                                                                                                                                                                                                                                                                                                                                                                                                                                                                                                                                                                                                                                                                                                                                                                                                                                                                                         | hydrophobic motif | polar motif | WPY triad | RT / n-Src loop lengths |
|--------------------------------------------------------------------------------------------------------------------------------------------------------------------------------------------------------------------------------------------------------------------------------------------------------------------------------------------------------------------------------------------------------------------------------------------------------------------------------------------------------------------------------------------------------------------------------------------------------------------------------------------------------------------------------------------------------------------------------------------------------------------------------------------------------------------------------------------------------------------------------------------------------------------------------------------------------------------------------------------------------------------------------------------------------------------------------------------------------------------------------------------------------------------------------------------------------------------------------------------------------------------------------------------------------------------------------------------------------------------------------------------------------------------------------------------------------------------------------------------------------------------------------------------------------------------------------------------------------------------------------------------------------------------------------------------------------------------------------------------------------------------------------------------------------------------------------------------------------------------------------|-------------------|-------------|-----------|-------------------------|
| <b>Rvs167 family</b>                                                                                                                                                                                                                                                                                                                                                                                                                                                                                                                                                                                                                                                                                                                                                                                                                                                                                                                                                                                                                                                                                                                                                                                                                                                                                                                                                                                                                                                                                                                                                                                                                                                                                                                                                                                                                                                           |                   |             |           |                         |
| AgRvs167                                                                                                                                                                                                                                                                                                                                                                                                                                                                                                                                                                                                                                                                                                                                                                                                                                                                                                                                                                                                                                                                                                                                                                                                                                                                                                                                                                                                                                                                                                                                                                                                                                                                                                                                                                                                                                                                       | YDF               | DLSF        | WPY       | 18 / 5                  |
| CaRvs167                                                                                                                                                                                                                                                                                                                                                                                                                                                                                                                                                                                                                                                                                                                                                                                                                                                                                                                                                                                                                                                                                                                                                                                                                                                                                                                                                                                                                                                                                                                                                                                                                                                                                                                                                                                                                                                                       | YDY               | DLTF        | WPY       | 18 / 5                  |
| ScRvs167                                                                                                                                                                                                                                                                                                                                                                                                                                                                                                                                                                                                                                                                                                                                                                                                                                                                                                                                                                                                                                                                                                                                                                                                                                                                                                                                                                                                                                                                                                                                                                                                                                                                                                                                                                                                                                                                       | YDY               | DLSF        | WPY       | 18 / 6                  |
| SpRvs167                                                                                                                                                                                                                                                                                                                                                                                                                                                                                                                                                                                                                                                                                                                                                                                                                                                                                                                                                                                                                                                                                                                                                                                                                                                                                                                                                                                                                                                                                                                                                                                                                                                                                                                                                                                                                                                                       | YDY               | DLSF        | WPY       | 18 / 6                  |
| CaRvs167-2                                                                                                                                                                                                                                                                                                                                                                                                                                                                                                                                                                                                                                                                                                                                                                                                                                                                                                                                                                                                                                                                                                                                                                                                                                                                                                                                                                                                                                                                                                                                                                                                                                                                                                                                                                                                                                                                     | HDF               | DLRF        | WPY       | 18 / 3                  |
| CaRvs167-3                                                                                                                                                                                                                                                                                                                                                                                                                                                                                                                                                                                                                                                                                                                                                                                                                                                                                                                                                                                                                                                                                                                                                                                                                                                                                                                                                                                                                                                                                                                                                                                                                                                                                                                                                                                                                                                                     | YDF               | DLSF        | WPY       | 18 / 14                 |
| AgRvs167-2                                                                                                                                                                                                                                                                                                                                                                                                                                                                                                                                                                                                                                                                                                                                                                                                                                                                                                                                                                                                                                                                                                                                                                                                                                                                                                                                                                                                                                                                                                                                                                                                                                                                                                                                                                                                                                                                     | YDY               | YLSI        | WPY       | 20 / 4                  |
| SpScp2                                                                                                                                                                                                                                                                                                                                                                                                                                                                                                                                                                                                                                                                                                                                                                                                                                                                                                                                                                                                                                                                                                                                                                                                                                                                                                                                                                                                                                                                                                                                                                                                                                                                                                                                                                                                                                                                         | YSF               | ELKL        | WPY       | 18 / 4                  |
| SpScp1                                                                                                                                                                                                                                                                                                                                                                                                                                                                                                                                                                                                                                                                                                                                                                                                                                                                                                                                                                                                                                                                                                                                                                                                                                                                                                                                                                                                                                                                                                                                                                                                                                                                                                                                                                                                                                                                         | YSF               | ELDL        | WPY       | 18 / 4                  |
| <pre> AgRvs167      ETC I A L Y D F A A Q A -- D G D L S F P V N A I I E I L D R S D A ----- A G W W T G R Y ----- N G R E G L F P A N Y V A L K H CaRvs167      P T C T A L Y D Y T A Q A -- Q G D L T F P A G A V I E I I Q R T E D ----- A N G W W T G K Y ----- N G Q T G V F P G N Y V -- Q ScRvs167      E T V T A L Y D Y Q A Q A -- A G D L S F P A G A V I E I V Q R T P D ----- V N E W W T G R Y ----- N G Q Q G V F P G N Y V Q L N K SpRvs167      E H V V A L Y D Y A A Q A -- A G D L S F H A G D R I E V V S R T D N ----- Q N E W W I G R L ----- N G A Q G Q F P G N Y V Q L - E CaRvs167-2    S Y C Y A L H D F A G Q E -- E L D L R F S K G D K I K I L V G N ----- G T W W E R Q L ----- N G K I G Q F P S N Y V Q L - I CaRvs167-3    V L K T A K Y D F S G Y E -- P G D L S F K Q G D N I E I L L D F Q N I D T L Y H S D E L N W L I G V S R I --- D D E S Y R I G F P N N Y V E --- AgRvs167-2    V Y A T A L Y D Y D P Q F N D P Q Y L S I K K G D I I Q V I T Q S K ----- N G W W Y G D L L ----- R T K T K G L F P Q S Y V V Q V Q D SpScp2        K V V R M K Y S H E P E T -- E N E L K L K K G D L L L V L K E I D ----- E G W W V G E K L G E D G V F T G N T G M F P S N Y C V P A H SpScp1        V F V K A I Y S H E T G R N -- E K E L D L H T G D V I Q V S E Q L G ----- P D W Y M G E K V N S K A E K L G N S G M F P V N Y C T R I Y </pre>                                                                                                                                                                                                                                                                                                                                                                                                                                                                                            |                   |             |           |                         |
| <b>Sla1 family</b>                                                                                                                                                                                                                                                                                                                                                                                                                                                                                                                                                                                                                                                                                                                                                                                                                                                                                                                                                                                                                                                                                                                                                                                                                                                                                                                                                                                                                                                                                                                                                                                                                                                                                                                                                                                                                                                             |                   |             |           |                         |
| AgSla1-D1                                                                                                                                                                                                                                                                                                                                                                                                                                                                                                                                                                                                                                                                                                                                                                                                                                                                                                                                                                                                                                                                                                                                                                                                                                                                                                                                                                                                                                                                                                                                                                                                                                                                                                                                                                                                                                                                      | YAY               | ELAL        | WPY       | 18 / 6                  |
| AgSla1-D2                                                                                                                                                                                                                                                                                                                                                                                                                                                                                                                                                                                                                                                                                                                                                                                                                                                                                                                                                                                                                                                                                                                                                                                                                                                                                                                                                                                                                                                                                                                                                                                                                                                                                                                                                                                                                                                                      | YDY               | ELVF        | WPY       | 20 / 5                  |
| AgSla1-D3                                                                                                                                                                                                                                                                                                                                                                                                                                                                                                                                                                                                                                                                                                                                                                                                                                                                                                                                                                                                                                                                                                                                                                                                                                                                                                                                                                                                                                                                                                                                                                                                                                                                                                                                                                                                                                                                      | YNF               | ELTV        | WPY       | 18 / 6                  |
| CaSla1-D1                                                                                                                                                                                                                                                                                                                                                                                                                                                                                                                                                                                                                                                                                                                                                                                                                                                                                                                                                                                                                                                                                                                                                                                                                                                                                                                                                                                                                                                                                                                                                                                                                                                                                                                                                                                                                                                                      | YDY               | ELNI        | WPY       | 18 / 6                  |
| CaSla1-D2                                                                                                                                                                                                                                                                                                                                                                                                                                                                                                                                                                                                                                                                                                                                                                                                                                                                                                                                                                                                                                                                                                                                                                                                                                                                                                                                                                                                                                                                                                                                                                                                                                                                                                                                                                                                                                                                      | YDY               | ELSF        | WPY       | 18 / 5                  |
| CaSla1-D3                                                                                                                                                                                                                                                                                                                                                                                                                                                                                                                                                                                                                                                                                                                                                                                                                                                                                                                                                                                                                                                                                                                                                                                                                                                                                                                                                                                                                                                                                                                                                                                                                                                                                                                                                                                                                                                                      | YDF               | ELDC        | WPF       | 18 / 6                  |
| ScSla1-D1                                                                                                                                                                                                                                                                                                                                                                                                                                                                                                                                                                                                                                                                                                                                                                                                                                                                                                                                                                                                                                                                                                                                                                                                                                                                                                                                                                                                                                                                                                                                                                                                                                                                                                                                                                                                                                                                      | YAY               | ELAI        | WPY       | 18 / 6                  |
| ScSla1-D2                                                                                                                                                                                                                                                                                                                                                                                                                                                                                                                                                                                                                                                                                                                                                                                                                                                                                                                                                                                                                                                                                                                                                                                                                                                                                                                                                                                                                                                                                                                                                                                                                                                                                                                                                                                                                                                                      | YDY               | ELTF        | WPY       | 20 / 5                  |
| ScSla1-D3                                                                                                                                                                                                                                                                                                                                                                                                                                                                                                                                                                                                                                                                                                                                                                                                                                                                                                                                                                                                                                                                                                                                                                                                                                                                                                                                                                                                                                                                                                                                                                                                                                                                                                                                                                                                                                                                      | YDF               | ELTI        | WPF       | 18 / 6                  |
| SpSla1-D1                                                                                                                                                                                                                                                                                                                                                                                                                                                                                                                                                                                                                                                                                                                                                                                                                                                                                                                                                                                                                                                                                                                                                                                                                                                                                                                                                                                                                                                                                                                                                                                                                                                                                                                                                                                                                                                                      | YSY               | EISI        | WPY       | 28 / 5                  |
| SpSla1-D2                                                                                                                                                                                                                                                                                                                                                                                                                                                                                                                                                                                                                                                                                                                                                                                                                                                                                                                                                                                                                                                                                                                                                                                                                                                                                                                                                                                                                                                                                                                                                                                                                                                                                                                                                                                                                                                                      | YDY               | EISF        | WPY       | 18 / 5                  |
| SpSla1-D3                                                                                                                                                                                                                                                                                                                                                                                                                                                                                                                                                                                                                                                                                                                                                                                                                                                                                                                                                                                                                                                                                                                                                                                                                                                                                                                                                                                                                                                                                                                                                                                                                                                                                                                                                                                                                                                                      | YDF               | ELTV        | WPF       | 18 / 6                  |
| <pre> AgSla1-D1     G V Y K A V Y A Y E P -- Q ----- N E E E L A I E E D E L L Y L L Q K S E V D D W T V K K R V L --- G G D M D E P V G L V P N N Y I E E A P AgSla1-D2     G R V R S V Y D Y E E A Q N ----- P D E L V F R E G D E F D V Y D D R - D A D W V L V R K R A ----- D G S V G F A P G N Y V E K V G AgSla1-D3     K R G I I K Y N F F G -- E ----- S S D E L T V K E G D V V Y I L N D K K S A D W M M C E I I G ----- T S R Q G V I P A Q F I D V Q P CaSla1-D1     G V Y K A L Y D Y A A -- Q ----- A E E E L N I K Q N D L L Y L L E K S D I D D W W K V K K R V V A T G E E I V D E P S G L V P S T Y I E E A P CaSla1-D2     K T A T A L Y D Y D K -- Q ----- T E E E L S F N E N D K F N V F D L N - D P D W I L V G D L A ----- K E K F G F V P S N Y I Q L D S CaSla1-D3     K I G R L L Y D F E V -- Q ----- G D D E L D C K E G D E V Y I I D Q K K S K D W M V E N I A ----- T R R Q G V V P S T Y I E I I S ScSla1-D1     G - Y R A V Y A Y E P -- Q ----- T P E E L A I Q E D D L L Y L L Q K S D I D D W W T V K K R V I --- G S D S E E P V G L V P S T Y I E E A P ScSla1-D2     K K V R A I Y D Y E V Q N ----- A D E L T F H E N D V F D V F D D K - D A D W L L V K S T V ----- S N E F G F I P G N Y V E P E N ScSla1-D3     K R G I V Q Y D F M A -- E ----- S Q D E L T I K S G D K V Y I L D D K K S K D W M M C Q L V D ----- S G K S G L V P A Q F I E P V R SpSla1-D1     G I Y K V L Y S Y E P -- Q E I N P G E E I P E N E R E I S I V E D E I V C L L E K G - E D D W Y L V K R N V N --- S N D D D E E I G I V P S N Y I T E A E SpSla1-D2     T K M K A L Y D Y T Q -- Q ----- S V D E I S F A D Q T L D C Y G D T - D S D W I L V G F ----- N N N F G L A P R N Y V E G M D SpSla1-D3     K M G T V L Y D F I A -- E ----- A A D E L T V K A N M R V V I V N D T A S S D W W K C S V ----- D G K E G V V P S N E I K P D T </pre> |                   |             |           |                         |
| <b>Sho1 family</b>                                                                                                                                                                                                                                                                                                                                                                                                                                                                                                                                                                                                                                                                                                                                                                                                                                                                                                                                                                                                                                                                                                                                                                                                                                                                                                                                                                                                                                                                                                                                                                                                                                                                                                                                                                                                                                                             |                   |             |           |                         |
| AgSho1                                                                                                                                                                                                                                                                                                                                                                                                                                                                                                                                                                                                                                                                                                                                                                                                                                                                                                                                                                                                                                                                                                                                                                                                                                                                                                                                                                                                                                                                                                                                                                                                                                                                                                                                                                                                                                                                         | YAY               | EISF        | WPY       | 20 / 5                  |
| ScSho1                                                                                                                                                                                                                                                                                                                                                                                                                                                                                                                                                                                                                                                                                                                                                                                                                                                                                                                                                                                                                                                                                                                                                                                                                                                                                                                                                                                                                                                                                                                                                                                                                                                                                                                                                                                                                                                                         | YPY               | EISF        | WPY       | 20 / 5                  |
| CaSho1                                                                                                                                                                                                                                                                                                                                                                                                                                                                                                                                                                                                                                                                                                                                                                                                                                                                                                                                                                                                                                                                                                                                                                                                                                                                                                                                                                                                                                                                                                                                                                                                                                                                                                                                                                                                                                                                         | YSY               | EISF        | WPY       | 20 / 5                  |
| <pre> AgSho1      Y T A K A L Y A Y E A D A S D A Y E I S F Q Q G E I L R V G D I E G R W W K A K K A N G E T G I I P S N Y V E L V D ScSho1      Y K A K A L Y P Y D A D D D D A Y E I S F E Q N E I L Q V S D I E G R W W K A R R A N G E T G I I P S N Y V Q L I D CaSho1      Y K A K A L Y S Y D A N P D D I N E I S F V K D E I L E V D D I D G K W W Q A R R A N G Q V G I C P S N Y V K L L D </pre>                                                                                                                                                                                                                                                                                                                                                                                                                                                                                                                                                                                                                                                                                                                                                                                                                                                                                                                                                                                                                                                                                                                                                                                                                                                                                                                                                                                                                                                                   |                   |             |           |                         |
